# Supplementary material for: Kidney Function and Physical Performance Decline: The Brain in Kidney Disease (BRINK) Cohort Study
Source: PubMed Central journal article supplement — Kidney Med. 2023 Dec 5;6(2):100770. doi: 10.1016/j.xkme.2023.100770 (PMC10839774; doi:10.1016/j.xkme.2023.100770), 2023-12-05
Supplement: mmc1.pdf [file mmc1.pdf]

**Table S1. AIC and BIC for competing correlation structures**

| Random intercept models |                     |                   |                                |
|-------------------------|---------------------|-------------------|--------------------------------|
|                         | Auto-regressive (1) | Compound Symmetry | Autocorrelation-moving average |
| <b>AIC</b>              | 7951.6              | 7951.6            | 7955.6                         |
| <b>BIC</b>              | 8034.7              | 8034.7            | 8049.8                         |

**Table S2. Number of participants in KDIGO risk categories, including eGFR and UACR at non-dialysis person-visits**

| eGFR (mL/min/1.73 m <sup>2</sup> ) Categories | uACR (mg/g) Categories |                |          | Total |
|-----------------------------------------------|------------------------|----------------|----------|-------|
|                                               | A1: <30                | A2: 30 to <300 | A3: ≥300 |       |
| <b>G1: ≥90</b>                                | 123                    | 21             | 4        | 148   |
| <b>G2: 60 to &lt;90</b>                       | 312                    | 53             | 14       | 379   |
| <b>G3a: 45 to &lt;60</b>                      | 192                    | 73             | 26       | 291   |
| <b>G3b: 30 to &lt;45</b>                      | 285                    | 186            | 116      | 587   |
| <b>G4: 15 to &lt;30</b>                       | 81                     | 108            | 144      | 333   |
| <b>G5: &lt;15</b>                             | 3                      | 21             | 39       | 63    |
| <b>Total</b>                                  | 996                    | 462            | 343      | 1,801 |

**Color Key: KDIGO CKD Risk Categories**

|                      |  |
|----------------------|--|
| Low risk             |  |
| Moderately high risk |  |
| High risk            |  |
| Very high risk       |  |

**Table S3. Yearly mean change in total SPPB score and gait speed (m/s) by KDIGO CKD risk group**

|                                                                        | Model 1                 |         | Model 2                 |         | Model 3                 |         |
|------------------------------------------------------------------------|-------------------------|---------|-------------------------|---------|-------------------------|---------|
|                                                                        | Estimate (95% CI)       | P-value | Estimate (95% CI)       | P-value | Estimate (95% CI)       | P-value |
| <i>Yearly mean change in total SPPB score by KDIGO risk categories</i> |                         |         |                         |         |                         |         |
| Low risk                                                               | -0.13 (-0.22, -0.04)    |         | -0.08 (-0.20, 0.04)     |         | -0.08 (-0.20, 0.04)     |         |
| Moderately high risk                                                   | -0.13 (-0.26, -0.00)    | P trend | -0.01 (-0.17, 0.14)     | P trend | -0.01 (-0.17, 0.14)     | P trend |
| High risk                                                              | -0.21 (-0.32, -0.09)    | <0.001  | -0.12 (-0.25, 0.01)     | <0.001  | -0.12 (-0.25, 0.01)     | <0.001  |
| Very high risk                                                         | -0.38 (-0.47, -0.30)    |         | -0.28 (-0.38, -0.19)    |         | -0.28 (-0.38, -0.19)    |         |
| <i>Yearly mean change in gait speed (m/s) by KDIGO risk categories</i> |                         |         |                         |         |                         |         |
| Low risk                                                               | -0.013 (-0.023, -0.004) |         | -0.018 (-0.031, -0.006) |         | -0.018 (-0.031, -0.006) |         |
| Moderately high risk                                                   | -0.027 (-0.040, -0.014) | P trend | -0.031 (-0.046, -0.015) | P trend | -0.031 (-0.046, -0.015) | P trend |
| High risk                                                              | -0.030 (-0.042, -0.019) | <0.001  | -0.033 (-0.047, -0.020) | <0.001  | -0.033 (-0.047, -0.020) | <0.001  |
| Very high risk                                                         | -0.037 (-0.046, -0.029) |         | -0.035 (-0.045, -0.025) |         | -0.035 (-0.045, -0.025) |         |

Abbreviations: SPPB, short physical performance battery

Model 1: KDIGO CKD risk groups

Model 2: Model 1 with additional adjustment for age, sex, race, and years of education

Model 3: Model 2 with additional adjustment for body mass index, Diabetes Mellitus, cognitive impairment, and congestive heart failure
